# Supplementary material for: Organic Extract of Justicia pectoralis Jacq. Leaf Inhibits Interferon‐γ Secretion and Has Bacteriostatic Activity against Acinetobacter baumannii and Klebsiella pneumoniae
Source: Hindawi journal article supplement (doi:10.1155/2018/5762368), 2018-01-01
Supplement: f1 [file 5762368.f1.pdf]

## Supplementary Material

Table S1. Mobile phase, reagents and standards used to phytochemical characterization of *Justicia pectoralis* crude extracts.

| Metabolites Class     | Mobile Phase | Reagents                      | Standards                         |
|-----------------------|--------------|-------------------------------|-----------------------------------|
| Hydrolysable tannins  | 90:5:5       | NEU + PEG                     | Gallic Acid and Ellagic Acid      |
| Flavonoids            | 90:5:5       | NEU + PEG                     | Quercetin and Rutin               |
| Cinnamic derivatives  | 90:5:5       | NEU + PEG                     | Caffeic Acid and Chlorogenic Acid |
| Condensed tannins     | 90:5:5       | Vanilin chloride              | Catechin                          |
| Coumarin              | 50:50:50     | KOH + $\Delta$                | Coumarin                          |
| Terpenes and Steroids | 70:30        | Lieberman-Burchard + $\Delta$ | $\beta$ -Sitosterol               |

Systems: 90:5:5 – ethyl acetate : formic acid : water; 50:50:50 - ethyl ether: ethyl acetate: acetic acid 10% (saturation); 70:30 – Toluene: ethyl acetate; KOH: Potassium hydroxide;  $\Delta$  – heating. NEU: 2-Aminoethyl diphenyl borate; PEG: polyethylenoglicol.
